# Supplementary material for: A multicenter retrospective observational NAPOLEON2 study of nanoliposomal irinotecan with fluorouracil and folinic acid in patients with unresectable pancreatic cancer
Source: PubMed Central journal article supplement (PMC11139902; doi:10.1038/s41598-024-63172-y), 2024-05-30
Supplement: 41598_2024_63172_MOESM1_ESM.pdf [file 41598_2024_63172_MOESM1_ESM.pdf]

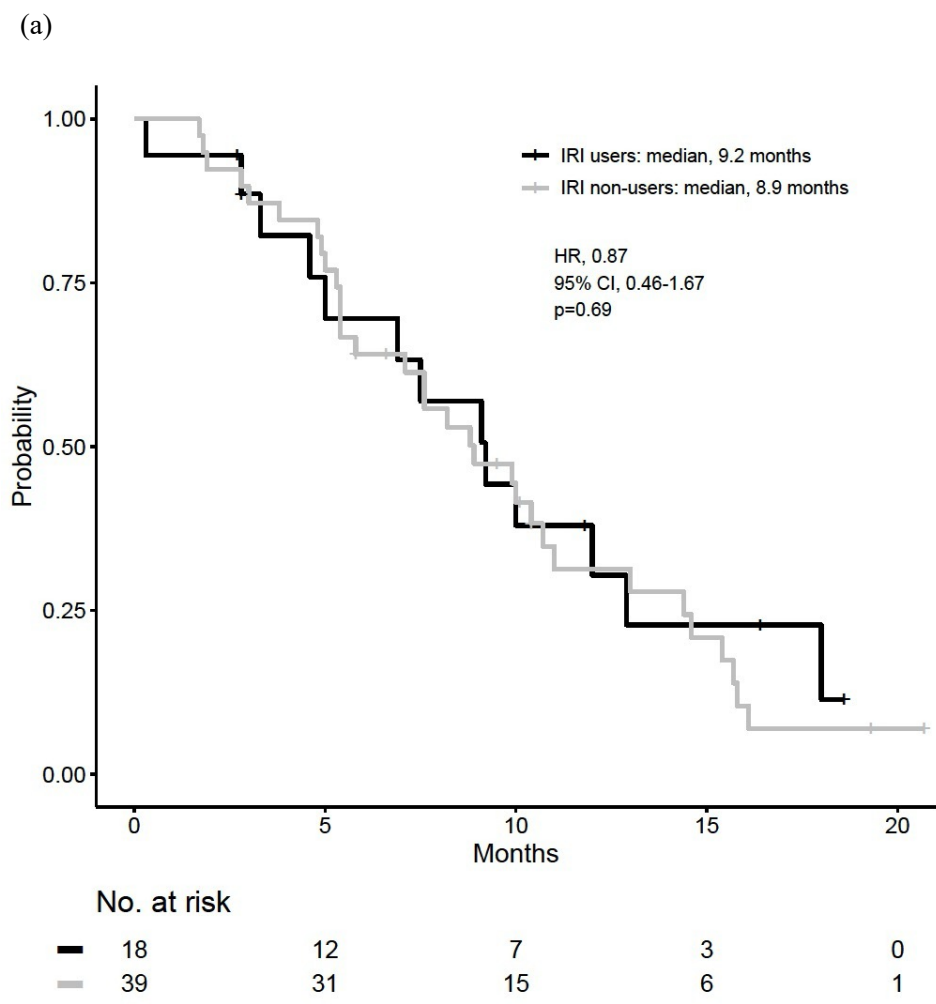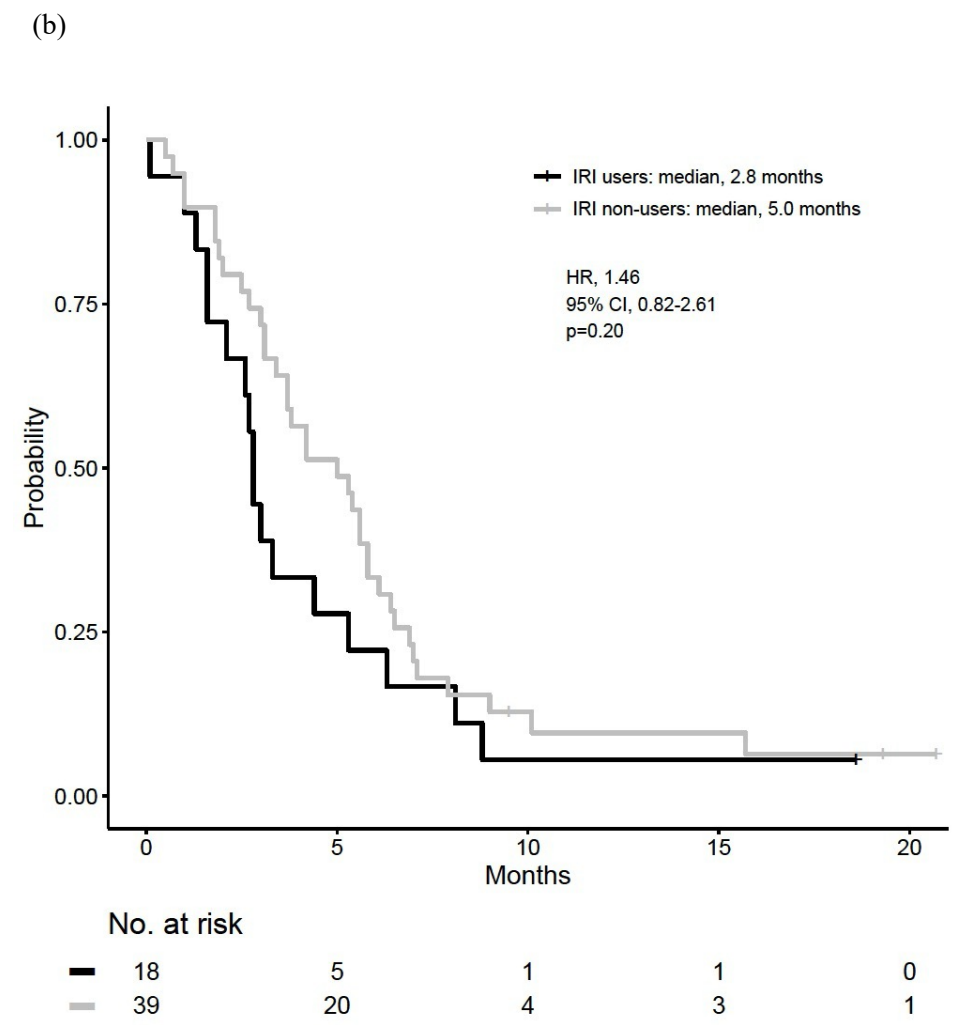

SF 1. Kaplan–Meier survival curves for nanoliposomal irinotecan and fluorouracil with leucovorin after irinotecan containing regimen and not containing regimen. (a) Overall survival, (b) progression-free survival.

HR hazard ratio, CI confidence interval, IRI users patients who had previously received irinotecan containing regimen, IRI non-users patients who had never received irinotecan containing regimen

### **Supplemental Figure legend**

Kaplan–Meier survival curves for nanoliposomal irinotecan and fluorouracil with leucovorin after irinotecan containing regimen and not containing regimen. (a) Overall survival, (b) progression-free survival.

*HR* hazard ratio, *CI* confidence interval, *IRI users* patients who had previously received irinotecan containing regimen, *IRI non-users* patients who had never received irinotecan containing regimen

**Supplemental Table 1. Univariate and multivariate Cox proportional hazards models to predict PFS and OS at the start of NFF**

|                                                    | PFS        |           |                 |              |           |                 | OS         |           |                 |              |           |                 |
|----------------------------------------------------|------------|-----------|-----------------|--------------|-----------|-----------------|------------|-----------|-----------------|--------------|-----------|-----------------|
|                                                    | Univariate |           |                 | Multivariate |           |                 | Univariate |           |                 | Multivariate |           |                 |
|                                                    | HR         | 95% CI    | <i>p</i> -Value | HR           | 95% CI    | <i>p</i> -Value | HR         | 95% CI    | <i>p</i> -Value | HR           | 95% CI    | <i>p</i> -Value |
| Age (years)                                        |            |           |                 |              |           |                 |            |           |                 |              |           |                 |
| ≥75                                                | 0.79       | 0.51–1.22 | 0.29            | 0.99         | 0.61–1.61 | 0.96            | 0.68       | 0.41–1.14 | 0.15            | 0.78         | 0.45–1.36 | 0.38            |
| ECOG PS                                            |            |           |                 |              |           |                 |            |           |                 |              |           |                 |
| ≥1                                                 | 1.13       | 0.82–1.56 | 0.45            | 0.98         | 0.69–1.41 | 0.92            | 1.38       | 0.95–1.99 | 0.09            | 1.12         | 0.74–1.68 | 0.59            |
| History of pancreatectomy                          |            |           |                 |              |           |                 |            |           |                 |              |           |                 |
| yes                                                | 0.85       | 0.59–1.24 | 0.40            | 0.82         | 0.52–1.32 | 0.42            | 0.73       | 0.47–1.13 | 0.16            | 0.70         | 0.41–1.18 | 0.17            |
| Duration of previous chemotherapy regimen (months) |            |           |                 |              |           |                 |            |           |                 |              |           |                 |
| <9.8 (median)                                      | 1.48       | 1.06–2.07 | 0.02            | 1.62         | 1.08–2.43 | 0.02            | 1.64       | 1.13–2.39 | 0.01            | 2.38         | 1.48–3.83 | <0.01           |
| Treatment line of Nal-IRI                          |            |           |                 |              |           |                 |            |           |                 |              |           |                 |
| 3rd-or-later line                                  | 0.92       | 0.66–1.28 | 0.62            | 1.76         | 1.13–3.20 | 0.02            | 0.96       | 0.66–1.39 | 0.83            | 2.35         | 1.43–3.86 | <0.01           |
| Liver metastasis                                   |            |           |                 |              |           |                 |            |           |                 |              |           |                 |
| Yes                                                | 1.39       | 1.00–1.92 | 0.048           | 1.13         | 0.77–1.65 | 0.53            | 1.08       | 0.75–1.55 | 0.69            | 0.86         | 0.57–1.30 | 0.47            |

|                                     |      |           |       |      |           |       |      |           |       |      |           |       |
|-------------------------------------|------|-----------|-------|------|-----------|-------|------|-----------|-------|------|-----------|-------|
| Ascites                             |      |           |       |      |           |       |      |           |       |      |           |       |
| Yes                                 | 1.63 | 1.03–2.57 | 0.04  | 1.90 | 1.13–3.20 | 0.02  | 2.25 | 1.38–3.68 | <0.01 | 2.52 | 1.45–4.40 | <0.01 |
| CA19-9<br>(U/mL)                    |      |           |       |      |           |       |      |           |       |      |           |       |
| ≥37.0<br>(upper limit<br>of normal) | 0.96 | 0.63–1.47 | 0.86  | 1.16 | 0.73–1.87 | 0.52  | 1.00 | 0.62–1.63 | 0.99  | 1.26 | 0.75–2.13 | 0.38  |
| NLR                                 |      |           |       |      |           |       |      |           |       |      |           |       |
| ≥3.16<br>(median)                   | 1.36 | 0.98–1.88 | 0.06  | 1.14 | 0.79–1.63 | 0.49  | 1.84 | 1.27–2.67 | <0.01 | 1.53 | 1.02–2.29 | 0.04  |
| CAR                                 |      |           |       |      |           |       |      |           |       |      |           |       |
| ≥0.079<br>(median)                  | 2.21 | 1.58–3.10 | <0.01 | 2.07 | 1.42–3.03 | <0.01 | 3.03 | 2.06–4.46 | <0.01 | 2.75 | 1.79–4.22 | <0.01 |

---

*Abbreviations:* *PFS* progression-free survival, *OS* overall survival, *NFF* Nanoliposomal irinotecan and fluorouracil with folinic acid, *HR* hazard ratio, 95% CI; 95% confidence interval, *ECOG PS* Eastern Cooperative Oncology Group performance status, *Nal-IRI* nanoliposomal irinotecan, *CA19-9* carbohydrate antigen 19-9, *NLR* neutrophil-to-lymphocyte ratio, *CAR* C-reactive protein-albumin ratio

**Supplemental Table 2. Patient characteristics by treatment line for NFF**

| Characteristic                                 |                  | Second-line group<br>(n = 104) | Third- or later-line group<br>(n = 57) | p-Value |
|------------------------------------------------|------------------|--------------------------------|----------------------------------------|---------|
| Age, years                                     | Median (range)   | 70 (40–82)                     | 66 (38–85)                             | 0.03    |
| Sex, n (%)                                     | Male             | 61 (59)                        | 27 (47)                                | 0.17    |
| ECOG PS, n (%)                                 | 0                | 49 (47)                        | 25 (44)                                | 0.39    |
|                                                | 1                | 50 (48)                        | 26 (46)                                |         |
|                                                | ≥2               | 5 (5)                          | 6 (11)                                 |         |
| Stage, n (%)                                   | Metastatic       | 92 (89)                        | 50 (88)                                | 0.89    |
| History of pancreatectomy, n (%)               |                  | 14 (14)                        | 26 (46)                                | <0.01   |
| Duration time of previous chemotherapy, months | Median (range)   | 7.8 (1.4–33.0)                 | 14.9 (4.9–45.0)                        | <0.01   |
| Treatment line of Nal-IRI, n (%)               | 2nd              | 104 (100)                      | 0                                      | -       |
|                                                | 3rd              | 0 (0)                          | 41 (72)                                |         |
|                                                | 4th or later     | 0 (0)                          | 16 (28)                                |         |
| Previous drugs, n (%)                          | Fluoropyrimidine | 2 (2)                          | 50 (88)                                | <0.01   |
|                                                | Platinum         | 0 (0)                          | 20 (35)                                | <0.01   |
|                                                | Irinotecan       | 0 (0)                          | 18 (32)                                | <0.01   |
| Histology, n (%)                               | Adenocarcinoma   | 95 (91)                        | 53 (93)                                | 0.92    |
|                                                | Others           | 5 (5)                          | 2 (4)                                  |         |
|                                                | Uncertified      | 4 (4)                          | 2 (4)                                  |         |

|                           |                        |                   |                  |       |
|---------------------------|------------------------|-------------------|------------------|-------|
| Tumor location, n (%)     | Head                   | 37 (36)           | 30 (53)          | 0.04  |
| Site of metastasis, n (%) | Liver                  | 67 (64)           | 22 (39)          | <0.01 |
|                           | Peritoneum             | 29 (28)           | 15 (26)          | 0.83  |
| Ascites, n (%)            | +                      | 18 (17)           | 6 (11)           | 0.25  |
| CA19-9, U/ml              | Median (range)         | 1252 (0.6–489500) | 627 (0.6–543522) | 0.33  |
| UGT1A1, n (%)             | *6/*6, *6/*28, *28/*28 | 5 (5)             | 3 (5)            | 0.9   |

---

*Abbreviations:* *NFF* Nanoliposomal irinotecan and fluorouracil with folinic acid, *ECOG PS* Eastern Cooperative Oncology Group performance status, *Nal-IRI* nanoliposomal irinotecan, *CA19-9* carbohydrate antigen 19-9, *UGT1A1* Uridine diphosphate glucuronosyltransferase family 1 member A1

**Supplemental Table 3. Response to NFF by treatment line**

| Best overall response, n (%) | Second-line group<br>(n = 104) | Third-or-later-line group<br>(n = 57) | <i>p</i> -Value |
|------------------------------|--------------------------------|---------------------------------------|-----------------|
| CR                           | 0                              | 0                                     |                 |
| PR                           | 4 (4)                          | 4 (7)                                 |                 |
| SD                           | 46 (44)                        | 30 (52)                               |                 |
| PD                           | 45 (43)                        | 19 (33)                               |                 |
| NE                           | 9 (9)                          | 4 (7)                                 |                 |
| ORR (CR+PR), n (%)           | 4 (4)                          | 4 (7)                                 | 0.38            |
| DCR (CR+PR+SD), n (%)        | 50 (48)                        | 34 (60)                               | 0.16            |

*Abbreviations:* NFF Nanoliposomal irinotecan and fluorouracil with folinic acid, CR complete response, PR partial response, SD stable disease, PD progressive disease, NE not evaluable, ORR overall response rate, DCR, disease control rate

**Supplemental Table 4. AEs affecting  $\geq 5\%$  of patients during treatment with NFF in the second-line and third- or later-line groups**

|                        | All grades, n (%)              |                                          | <i>p</i> -Value | Grade $\geq 3$ , n (%)         |                                          | <i>p</i> -Value |
|------------------------|--------------------------------|------------------------------------------|-----------------|--------------------------------|------------------------------------------|-----------------|
|                        | Second-line group<br>(n = 104) | Third-or-later-line<br>group<br>(n = 57) |                 | Second-line group<br>(n = 104) | Third-or-later-line<br>group<br>(n = 57) |                 |
| <b>Hematologic</b>     |                                |                                          |                 |                                |                                          |                 |
| Neutropenia            | 40 (38)                        | 28 (49)                                  | 0.19            | 22 (21)                        | 16 (28)                                  | 0.32            |
| Leukopenia             | 38 (37)                        | 28 (49)                                  | 0.12            | 11 (11)                        | 8 (14)                                   | 0.52            |
| Anemia                 | 60 (58)                        | 26 (46)                                  | 0.14            | 10 (10)                        | 5 (9)                                    | 0.86            |
| Thrombocytopenia       | 11 (11)                        | 9 (16)                                   | 0.96            | 1 (1)                          | 1 (2)                                    | 0.66            |
| <b>Nonhematologic</b>  |                                |                                          |                 |                                |                                          |                 |
| Anorexia               | 76 (73)                        | 42 (74)                                  | 0.93            | 12 (12)                        | 8 (14)                                   | 0.65            |
| Malaise                | 60 (58)                        | 34 (60)                                  | 0.81            | 3 (3)                          | 2 (4)                                    | 0.83            |
| Fatigue                | 48 (46)                        | 31 (54)                                  | 0.32            | 2 (2)                          | 3 (5)                                    | 0.24            |
| Nausea                 | 44 (42)                        | 24 (42)                                  | 0.98            | 6 (6)                          | 3 (5)                                    | 0.89            |
| Diarrhea               | 29 (28)                        | 22 (39)                                  | 0.16            | 4 (4)                          | 1 (2)                                    | 0.46            |
| Vomiting               | 19 (18)                        | 13 (23)                                  | 0.49            | 1 (1)                          | 1 (2)                                    | 0.66            |
| Constipation           | 31 (30)                        | 19 (33)                                  | 0.64            | 0 (0)                          | 0 (0)                                    | -               |
| Liver enzyme elevation | 24 (23)                        | 17 (30)                                  | 0.35            | 2 (2)                          | 0 (0)                                    | 0.29            |



|                               |         |         |      |       |       |      |
|-------------------------------|---------|---------|------|-------|-------|------|
| Peripheral sensory neuropathy | 41 (39) | 22 (39) | 0.92 | 1 (1) | 0 (0) | 0.46 |
| Oral mucositis                | 11 (11) | 9 (16)  | 0.34 | 0 (0) | 1 (2) | 0.18 |
| Alopecia                      | 23 (22) | 13 (23) | 0.92 | -     | -     | -    |

---

*Abbreviations: AE* Adverse event, *NFF* Nanoliposomal irinotecan and fluorouracil with folinic acid

**Supplemental Table 5. Administered dose and reasons for dose reduction or discontinuation of NFF in the second-line and third- or later-line groups**

|                                                     | Nal-IRI                        |                                          | <i>p</i> -Value | Fluorouracil                      |                                          | <i>p</i> -Value |
|-----------------------------------------------------|--------------------------------|------------------------------------------|-----------------|-----------------------------------|------------------------------------------|-----------------|
|                                                     | Second-line group<br>(n = 104) | Third-or-later-line<br>group<br>(n = 57) |                 | Second-line<br>group<br>(n = 104) | Third-or-later-line<br>group<br>(n = 57) |                 |
| <b>Starting dose</b>                                |                                |                                          |                 |                                   |                                          |                 |
| Full dose, n (%)                                    | 69 (66)                        | 35 (61)                                  | 0.26            | 85 (82)                           | 38 (67)                                  | 0.03            |
| Reduction level 1, n (%) <sup>*</sup>               | 33 (32)                        | 18(32)                                   |                 | 17(16)                            | 13(23)                                   |                 |
| Reduction level 2, n (%) <sup>**</sup>              | 2 (2)                          | 4 (7)                                    |                 | 2 (2)                             | 6 (11)                                   |                 |
| <b>Minimum dose during treatment</b>                |                                |                                          |                 |                                   |                                          |                 |
| Full dose, n (%)                                    | 33 (32)                        | 16 (28)                                  | 0.31            | 51 (49)                           | 17 (30)                                  | <0.01           |
| Reduction level 1, n (%) <sup>*</sup>               | 53 (51)                        | 26 (46)                                  |                 | 42 (40)                           | 24 (42)                                  |                 |
| Reduction level 2, n (%) <sup>**</sup>              | 17 (16)                        | 12 (21)                                  |                 | 11 (11)                           | 14 (25)                                  |                 |
| Reduction level 3, n (%) <sup>***</sup>             | 1 (1)                          | 3 (5)                                    |                 | 0 (0)                             | 2 (4)                                    |                 |
| <b>Reasons of reduction during treatment, n (%)</b> |                                |                                          |                 |                                   |                                          |                 |
| No reduction                                        | 61 (59)                        | 33 (58)                                  |                 | 67 (64)                           | 32 (56)                                  |                 |
| Neutropenia                                         | 15 (14)                        | 10 (18)                                  |                 | 13 (13)                           | 10 (18)                                  |                 |
| Anorexia                                            | 15 (13)                        | 2 (5)                                    |                 | 9 (9)                             | 5 (9)                                    |                 |
| Nausea/Vomiting                                     | 12 (12)                        | 5 (9)                                    |                 | 4 (4)                             | 1 (2)                                    |                 |

|                 |       |       |       |       |
|-----------------|-------|-------|-------|-------|
| Diarrhea        | 1 (1) | 1 (2) | 2 (2) | 3 (5) |
| Fatigue         | 1 (1) | 1 (2) | 1 (1) | 1 (2) |
| Malaise         | 0 (0) | 2 (4) | 0 (0) | 2 (4) |
| Anemia          | 1 (1) | 0 (0) | 1 (1) | 0 (0) |
| Oral mucositis  | 0 (0) | 1 (2) | 0 (0) | 1 (2) |
| Patient request | 1 (1) | 0 (0) | 1 (1) | 0 (0) |
| Unknown         | 0 (0) | 1 (2) | 0 (0) | 1 (2) |
| Others          | 6 (6) | 1 (2) | 6 (6) | 1 (2) |

---

\*Reduction level -1: Nal-IRI 50 mg/m<sup>2</sup>, fluorouracil 1,800 mg/m<sup>2</sup>, \*\*reduction level -2: Nal-IRI 43 mg/m<sup>2</sup>, fluorouracil 1,350 mg/m<sup>2</sup>

\*\*\*Reduction level -3: Nal-IRI 35 mg/m<sup>2</sup>, fluorouracil 1,260mg/m<sup>2</sup>

For patients homozygous for UGT1A1\*6 or UGT1A1\*28 or heterozygous for UGT1A1\*6 and UGT1A1\*28, the reduction level -1 for Nal-IRI is 43 mg/m<sup>2</sup>, and the reduction level -2 is 35 mg/m<sup>2</sup>.

*Abbreviations: NFF* Nanoliposomal irinotecan and fluorouracil with folinic acid, *Nal-IRI* nanoliposomal irinotecan, *UGT1A1* Uridine diphosphate glucuronosyltransferase family 1 member A1

**Supplemental Table 6. Patient characteristics administered NFF after IRI use or non-use**

| Characteristic                                 |                  | IRI users (n = 18) | IRI non-users (n = 39) | <i>p</i> -Value |
|------------------------------------------------|------------------|--------------------|------------------------|-----------------|
| Age, years                                     | Median (range)   | 64 (38–78)         | 66 (47–85)             | 0.08            |
| Sex, n (%)                                     | Male             | 11 (61)            | 16 (41)                | 0.16            |
| ECOG PS, n (%)                                 | 0                | 8 (44)             | 17 (44)                | 0.19            |
|                                                | 1                | 10 (56)            | 16 (41)                |                 |
|                                                | ≥2               | 0 (0)              | 6 (15)                 |                 |
| Stage, n (%)                                   | Metastatic       | 16 (89)            | 34 (87)                | 0.86            |
| History of pancreateomy, n (%)                 |                  | 7 (39)             | 19 (49)                | 0.49            |
| Duration time of previous chemotherapy, months | Median (range)   | 15.3 (6.8–45.0)    | 14.7 (4.9–36.2)        | 0.90            |
| Treatment line of Nal-IRI, n (%)               | 2nd              | 0 (0)              | 0 (0)                  | -               |
|                                                | 3rd              | 18 (100)           | 39 (100)               |                 |
| Previous drugs, n (%)                          | Fluoropyrimidine | 18 (100)           | 32 (82)                | 0.06            |
|                                                | Platinum         | 18 (100)           | 2 (5)                  | <0.01           |
|                                                | Irinotecan       | 18 (100)           | 0 (0)                  | <0.01           |
| Histology, n (%)                               | Adenocarcinoma   | 15 (83)            | 38 (97)                | 0.09            |
|                                                | Others           | 2 (11)             | 0 (0)                  |                 |
|                                                | Uncertified      | 1 (6)              | 1 (3)                  |                 |
| Tumor location, n (%)                          | Head             | 8 (44)             | 22 (56)                | 0.40            |
| Site of metastasis, n (%)                      | Liver            | 8 (44)             | 14 (36)                | 0.54            |

|                |                        |                |               |      |
|----------------|------------------------|----------------|---------------|------|
|                | Peritoneum             | 4 (22)         | 11 (28)       | 0.63 |
| Ascites, n (%) | +                      | 2 (11)         | 4 (10)        | 0.92 |
| CA19-9, U/ml   | Median (range)         | 713 (2–543522) | 561 (1–48499) | 0.38 |
| UGT1A1, n (%)  | *6/*6, *6/*28, *28/*28 | 2 (11)         | 1 (3)         | 0.18 |

---

*Abbreviations:* *NFF* Nanoliposomal irinotecan and fluorouracil with folinic acid, *IRI* Irinotecan, *ECOG PS* Eastern Cooperative Oncology Group performance status, *Nal-IRI* nanoliposomal irinotecan, *CA19-9* carbohydrate antigen 19-9, *UGT1A1* Uridine diphosphate glucuronosyltransferase family 1 member A1

**Supplemental Table 7. Response to NFF by IRI users or non-users**

| Best overall response, n (%) | IRI users, (n = 18) | IRI non-users, (n = 39) | <i>p</i> -Value |
|------------------------------|---------------------|-------------------------|-----------------|
| CR                           | 0                   | 0                       |                 |
| PR                           | 1 (6)               | 3 (8)                   |                 |
| SD                           | 7 (39)              | 23 (59)                 |                 |
| PD                           | 9 (50)              | 10 (26)                 |                 |
| NE                           | 1 (6)               | 3 (8)                   |                 |
| ORR (CR+PR), n (%)           | 1 (6)               | 3 (8)                   | 0.77            |
| DCR (CR+PR+SD), n (%)        | 8 (44)              | 26 (67)                 | 0.11            |

*Abbreviations:* NFF Nanoliposomal irinotecan and fluorouracil with folinic acid, IRI Irinotecan, CR complete response, PR partial response, SD stable disease, PD progressive disease, NE not evaluable, ORR overall response rate, DCR, disease control rate
